# Supplementary material
Source: HighWire-hosted journal article supplement (https://ez-admanager.com/highwire/filestream/135165/field_highwire_adjunct_files/1/Appendices_e-4-7.pdf)
Supplement: Appendices_e-4-7.pdf [file Appendices_e-4-7.pdf]

## **Appendices e-4 through e-7**

### **Appendix e-4: Exclusion and inclusion criteria for article selection**

#### *Exclusion criteria*

Exclusion criteria comprise the following:

- Letters and case reports
- Non–English-language studies.
- Animal studies
- Pharmacodynamic/pharmacokinetic studies
- Studies dealing primarily with patients with established or chronic epilepsy
- Studies dealing primarily with acute provoked seizures

#### *Inclusion criteria*

- Study designs: observational (prospective, retrospective, and cross-sectional), or interventional (randomized, controlled trials [RCTs], nonrandomized, controlled trials [nRCTs], and uncontrolled case series [UCS])
- At least 10 patients, adults, with a first seizure, a first presentation with epilepsy or seizures, or a first diagnosis of epilepsy
- Patients should be over the age of 18 or the study should include a substantial proportion of subjects over the age of 18
- Studies reported in English only
- Studies dealing primarily with apparent unprovoked first seizures

## **Appendix e-5: Classification of evidence schemes**

### *A. Classification of therapeutic evidence*

**Class I.** Randomized controlled clinical trial (RCT) in a representative population. Masked or objective outcome assessment. Relevant baseline characteristics are presented and substantially equivalent between treatment groups, or there is appropriate statistical adjustment for differences. Also required: Concealed allocation. Primary outcomes clearly defined. Exclusion/inclusion criteria clearly defined. Adequate accounting for dropouts.

**Class II.** Cohort study meeting criteria for Class I or a RCT that lacks one or two of those other criteria. All relevant baseline characteristics are present and substantially equivalent among treatment groups or there is appropriate statistical adjustment for differences. Masked or objective outcome assessment.

**Class III.** Controlled studies (including well-defined natural history controls or patients serving as their own controls). A description of major confounding differences between treatment groups that could affect outcome. Outcome assessment masked, objective or preformed by someone who is not a member of the treatment team.

**Class IV.** Did not include patients with the disease. Did not include patients receiving different interventions. Undefined or unaccepted interventions or outcome measures. No measures of effectiveness or statistical precision present or calculable.

### *B. Classification of prognostic evidence*

**Class I.** Cohort survey with prospective data collection. Includes a spectrum of persons at risk for developing the outcome. Outcome measurement is objective or determined without knowledge of risk for developing the outcome. Also required: a. Inclusion criteria defined b. At least 80% of enrolled subjects have both the risk factor and outcome measured.

**Class II.** Cohort study with retrospective data collection or case-controlled study. Study meets criteria a and b (see Class I). Includes a broad spectrum of persons with and without the risk factor and the outcome. The presence of the risk factor and outcome are determined objectively or without knowledge of one another.

**Class III.** Cohort or case control study. Narrow spectrum of persons with or without the disease. The presence of the risk factor and outcome are determined objectively or without knowledge of the other or by different investigators.

**Class IV.** Did not include patients at risk for the outcome. Did not include patients with and without the risk factor. Undefined or unaccepted measures of risk factor or outcomes. No measures of association or statistical precision presented or calculable.

## **Appendix e-6: Classification of recommendations**

A = Established as effective, ineffective or harmful (or established as useful/predictive or not useful/predictive) for the given condition in the specified population. (Level A rating requires at least two consistent Class I studies.)\*

B = Probably effective, ineffective or harmful (or probably useful/predictive or not useful/predictive) for the given condition in the specified population. (Level B rating requires at least one Class I study or two consistent Class II studies.)

C = Possibly effective, ineffective or harmful (or possibly useful/predictive or not useful/predictive) for the given condition in the specified population. (Level C rating requires at least one Class II study or two consistent Class III studies.)

U = Data inadequate or conflicting; given current knowledge, treatment (test, predictor) is unproven.

\*In exceptional cases, one convincing Class I study may suffice for an “A” recommendation if 1) all criteria are met, 2) the magnitude of effect is large (relative rate improved outcome  $> 5$  and the lower limit of the confidence interval is  $> 2$ ).

## **Appendix e-7: All accepted articles**

- Annegers JF, Shirts SB, Hauser WA, Kurland LT. Risk of recurrence after an initial unprovoked seizure. *Epilepsia* 1986;27:43–50.
- Beghi E, Musicco M, Viani F, Bordo B, Hauser WA, Nicolosi A; and the First Seizure Trial Group (FIR.S.T. Group). A randomized trial on the treatment of the first epileptic seizure. Scientific background, rationale, study design and protocol. *Ital J Neurol Sci* 1993;14:295–301.
- Belcastro V, Costa C, Galletti F, et al. Leviteracetam in newly diagnosed late-onset post-stroke seizures: A prospective observational study. *Epilepsy Res* 2008;82:223–226.
- Bora I, Seckin B, Zarifoglu M, Turan F, Sadikoglu S, Ogul E. Risk of recurrence after first unprovoked tonic-clonic seizure in adults. *J Neurol* 1995;242:157–163.
- Breen DP, Dunn MJ, Davenport RJ, Gray AJ. Epidemiology, clinical characteristics, and management of adults referred to a teaching hospital first seizure clinic. *Postgrad Med J* 2005;81:715–718.
- Chandra B. First seizure in adults: To treat or not to treat. *Clin Neurol Neurosurg* 1992;94 (Suppl):S61–S63.
- Chandramoulesswaran V, Dhanaraj M, Rangaraj R, Vengatesan A. Patients' preferences towards antiepileptic drug therapy following first attack of seizure. *Neurol India* 2006;54:387–389.
- Das CP, Sawhney IM, Lal V, Prabhakar S. Risk of recurrence of seizures following a single unprovoked idiopathic seizure. *Neurol India* 2000;48:357–360.
- Edmondstone WM. How do we manage the first seizure in adults? *J R Coll Physicians Lond* 1995;29:289–294.
- Elwes RD, Chesterman P, Reynolds EH. Prognosis after a first untreated tonic-clonic seizure. *Lancet* 1985;2:752–753.
- First Seizure Trial Group (FIR.S.T. Group). Randomized clinical trial on the efficacy of antiepileptic drugs in reducing the risk of relapse after a first unprovoked tonic-clonic seizure. *Neurology* 1993;43:478–483.
- Gilad R, Lampl Y, Gabbay U, EshelY, Sarova-Pinchas I. Early treatment of a single generalized tonic-clonic seizure to prevent recurrence. *Arch Neurol* 1996;53:1149–1152.
- Gupta SK, Satishchandra P, Verkatesh A, Subbakrishna DK. Prognosis of single unprovoked seizure. *J Assoc Physicians India* 1993;41:709–710.

- Hart YM, Sander JW, Johnson AL, Shorvon SD. National General Practice Study of Epilepsy: recurrence after a first seizure. *Lancet* 1990;336:1271–1274.
- Hauser WA, Anderson VE, Loewenson RB, McRoberts SM. Seizure recurrence after a first unprovoked seizure. *N Engl J Med* 1982;307:522–528.
- Hauser WA, Rich SS, Annegers JF, Anderson VE. Seizure recurrence after a 1<sup>st</sup> unprovoked seizure: An extended follow-up. *Neurology* 1990;40:1163–1170.
- Hauser WA, Rich SS, Lee JR, Annegers JF, Anderson VE. Risk of recurrent seizures after two unprovoked seizures. *N Engl J Med* 1998;338:429–434.
- Hopkins A, Garman A, Clarke C. The first seizure in adult life. Value of clinical features, electroencephalography, and computerised tomographic scanning in prediction of seizure recurrence. *Lancet* 1988;1:721–726.
- Holt-Seitz A, Wirrell EC, Sundaram MB. Seizures in the elderly: Etiology and prognosis. *Can J Neurol Sci* 1999;26:110–114.
- Hui AC, Tang A, Wong KS, Mok V, Kay R. Recurrence after a first untreated seizure in the Hong Kong Chinese Population. *Epilepsia* 2001;42:94–97.
- Jacoby A, Gamble C, Doughty J, Marson A, Chadwick D; Medical Research Council MESS Study Group. Quality of life outcomes of immediate or delayed treatment of early epilepsy and single seizures. *Neurology* 2007;68:1188–1196.
- Jacoby A, Lane S, Marson A, Baker GA; MESS Study Group. Relationship of clinical quality of life trajectories following the onset of seizures: Findings from the UK MESS Study. *Epilepsia* 2011;52:965–974.
- Jallon P, Goumaz M, Haenggeli C, Morabia A. Incidence of first epileptic seizures in the canton of Geneva, Switzerland. *Epilepsia* 1997;38:547–552.
- Jallon P, Loiseau P, Loiseau J. Newly diagnosed unprovoked epileptic seizures: Presentation at diagnosis in CORALE study. Coordination Active du Réseau Observatoire Longitudinal de l' Epilepsie. *Epilepsia* 2001;42:464–475.
- Karwkabani A, Rossetti AO, Despland PA. Survey of management of first-ever seizures in a hospital based community. *Swiss Med Wkly* 2004;134:586–592.
- Kim LG, Johnson TL, Marson AG, Chadwick DW; MRC MESS Study group. Prediction of seizure recurrence after a single seizure and early epilepsy: Further results from the MESS trial. *Lancet Neurol* 2006;5:317–322.
- Kita MW. Seizure recurrence after a first unprovoked seizure: 36 month follow-up of 238 patients. *J Insur Med* 1992;24:203–206.

- Kho LK, Lawn ND, Dunne JW, Linto J. First seizure presentation. Do multiple seizures within 24 hours predict recurrence? *Neurology* 2006;67:1047–1049.
- Leone MA, Solari A, Beghi E; FIRST Group. Treatment of the first tonic-clonic seizure does not affect the long-term remission of epilepsy. *Neurology* 2006;67:2227–2229
- Leone MA, Vallalta R, Solari A, Beghi E; FIRST Group. Treatment of a first tonic-clonic seizure does not affect mortality: Long-term follow-up of a randomised clinical trial. *J Neurol Neurosurg Psychiatry* 2011;82:924–927.
- Lindsten H, Stenlund H, Forsgren L. Remission of seizures in a population-based adult cohort with a newly diagnosed unprovoked epileptic seizure. *Epilepsia* 2001;42:1025–1030.
- Lindsten H, Stenlund H, Edlund C, Forsgren L. Socioeconomic prognosis after a newly diagnosed unprovoked epileptic first seizure in adults: A population-based case-control study. *Epilepsia* 2002;43:1239–1250.
- Lindsten H, Stenlund H, Forsgren L. Leisure time and social activity after a newly diagnosed unprovoked epileptic seizure in adult age: A population-based case-referent study. *Acta Neurol Scand* 2003;107:125–133.
- Lühdorf K, Jensen LK, Plesner AM. Epilepsy in the elderly: Prognosis. *Acta Neurol Scand* 1986;74:409–415.
- MacDonald BK, Johnson AL, Goodridge DM, Cockerell OC, Sander JW, Shorvon SD. Factors predicting prognosis of epilepsy after presentation with seizures. *Ann Neurol* 2000;48:833–841.
- Marini C, King MA, Archer JS, Newton MR, Berkovic SF. Idiopathic generalized epilepsy of adult onset: Clinical syndromes and genetics. *J Neurol Neurosurg Psychiatry* 2003;74:192–196.
- Marson, A, Jacoby A, Johnson A, Kim L, Gamble C, Chadwick D; Medical Research Council MESS Study Group. Immediate versus deferred antiepileptic drug treatment for early epilepsy and single seizures: A randomized controlled trial. *Lancet* 2005;365:2007–2013.
- Musicco M, Behgi E, Solari A, Viani F; First Seizure Trial Group (FIRST Group). Treatment of first tonic-clonic seizure does not improve the prognosis of epilepsy. *Neurology* 1997;49:991–998.
- Najafi MR, Mehrabi A, Najafi F. Seizure recurrence after a first unprovoked seizure: With and without treatment. *J Res Med Sci* 2008;13:161–165.
- Pesola GR, Westfal RE. New-onset generalized seizures in patients with AIDS presenting to an emergency department. *Acad Emerg Med* 1998;5:905–911.

- Ruggles KH, Haessly SM, Berg RL. Prospective study of seizures in the elderly in the Marshfield Epidemiologic Study Area (MESA). *Epilepsia* 2001;42:1594–1599.
- Schreiner A, Pohlmann-Eden B. Value of the early electroencephalogram after a first unprovoked seizure. *Clin Electroencephalogr* 2003;34:140–144.
- Sierra-Marcos A, Toledo M, Quintana M, et al. Diagnosis of epileptic syndrome after a new onset seizure and its correlation at long-term follow-up: Longitudinal study of 131 patients from the emergency room. *Epilepsy Res* 2011;97:30–36.
- van Donselaar CA, Geerts AT, Schimsheimer RJ. Idiopathic first seizure in adult life: Who should be treated? *BMJ* 1991;302:620–623.
- van Donselaar CA, Schimsheimer RJ, Geerts AT Declerck AC. Value of the electroencephalogram in adult patients with untreated idiopathic first seizures. *Arch Neurol* 1992;49:231–237.
- Velissaris SL, Wilson SJ, Saling MM, Newton MR, Berkovic SF. The psychological impact of a newly diagnosed seizure: Losing and restoring perceived control. *Epilepsy Behav* 2007;10:223–233.
- Velissaris SL, Saling MM, Newton MR, Berkovic SF, Wilson SJ. Psychological trajectories in the year after a newly diagnosed seizure. *Epilepsia* 2012;53:1774–1781.
